# Supplementary material
Source: PubMed Central journal article supplement (PMC8324846)
Supplement: 41422_2021_519_MOESM1_ESM.pdf [file 41422_2021_519_MOESM1_ESM.pdf]

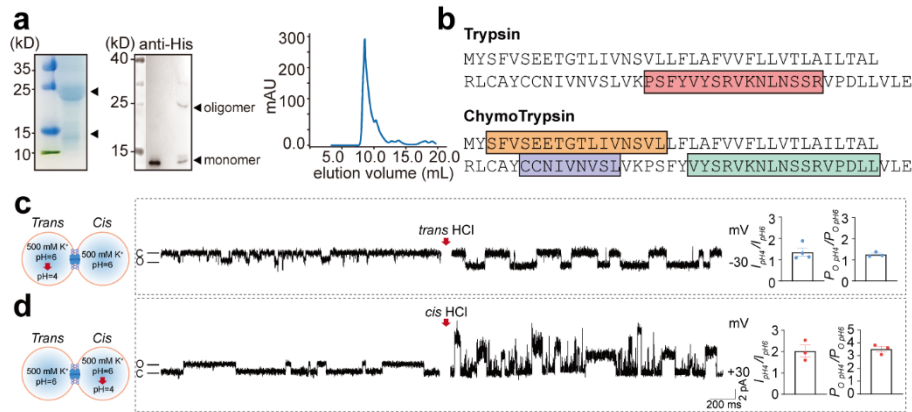

### Supplementary information, Fig.S1: Purification of 2-E proteins.

**a** Purification of full-length 2-E protein with Ni-NTA affinity chromatography. Left: 15% SDS-PAGE gel with coomassie blue staining; Middle: Western blot probed with anti-his-tag antibody; Right: Size-exclusion chromatogram of the affinity-purified 2-E protein. Data from a Superdex 75 Increase 10/300 column are shown in blue. The elution peak probably represents 2-E protein oligomers. **b** Four peptides (red, green, orange and purple) of 2-E were detected by LC-MS/MS. Two enzymatic methods were used. **c** Titration results of different pH on a same channel. The pH of the symmetric KCl solutions (*trans* : *cis* = 500 :500 mM) in the *cis* side was maintained at 6 and the pH of the solution in *trans* side was titrated to 4 (red arrow). Amplitude ( $I$ ) and open probability ( $P_o$ ) were normalized to the amplitude and open probability measured at pH 6 of both sides. **d** The pH in the *trans* side was maintained at 6 whereas the pH in *cis* side was titrated to 4 (red arrow). Amplitude ( $I$ ) and open probability ( $P_o$ ) were normalized to the amplitude and open probability measured at pH 6 of both sides. All error bars are SEM.
