# Supplementary material
Source: PubMed Central journal article supplement (PMC8324846)
Supplement: 41422_2021_519_MOESM2_ESM.pdf [file 41422_2021_519_MOESM2_ESM.pdf]

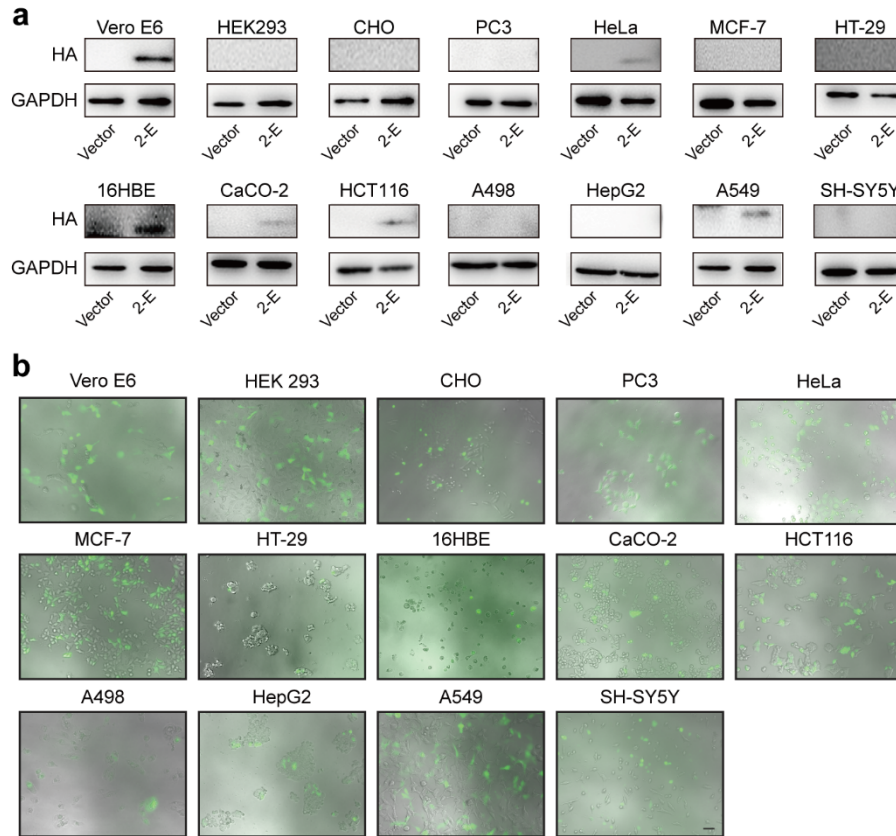

**Supplementary information, Fig. S2: Expression level of 14 cell lines after 2-E transfection.**

**a** Expression of 2-E in various cell lines. **b** Images for 14 cell lines after transfecting with GFP plasmid (Scale, 50  $\mu$ m).
