# Supplementary material
Source: PubMed Central journal article supplement (PMC8324846)
Supplement: 41422_2021_519_MOESM3_ESM.pdf [file 41422_2021_519_MOESM3_ESM.pdf]

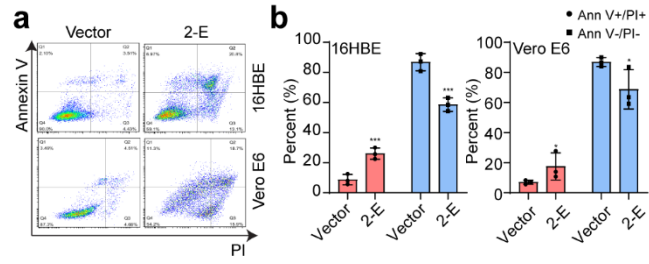

**Supplementary information, Fig. S3: 16HBE and Vero E6 cells transfected with 2-E plasmids.** Flow cytometry analysis of Propidium iodide (PI) and Annexin V stained 16HBE and Vero E6 cells.
