# Supplementary material
Source: PubMed Central journal article supplement (PMC8324846)
Supplement: 41422_2021_519_MOESM4_ESM.pdf [file 41422_2021_519_MOESM4_ESM.pdf]

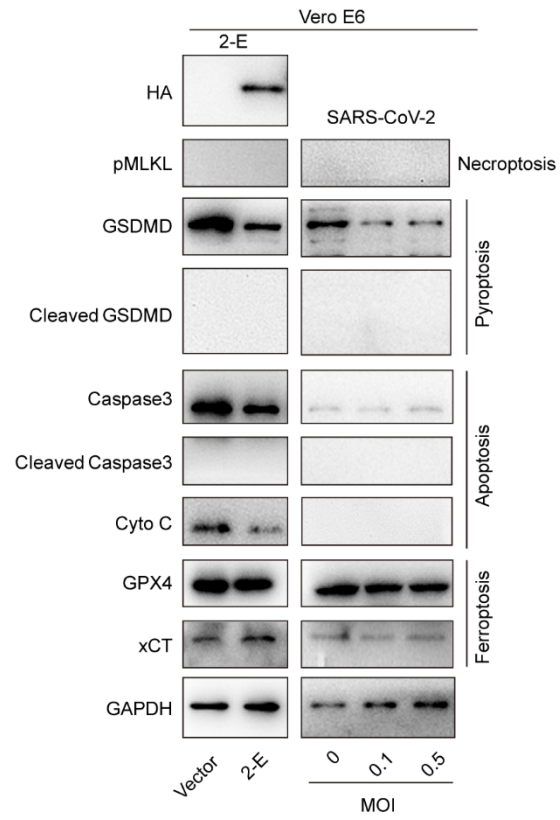

**Supplementary information, Fig. S4: Immunoblotting of cell death pathway biomarkers in 2-E transfected and SARS-CoV-2 infected Vero E6 cells.**
