# Supplementary material
Source: PubMed Central journal article supplement (PMC8324846)
Supplement: 41422_2021_519_MOESM6_ESM.pdf [file 41422_2021_519_MOESM6_ESM.pdf]

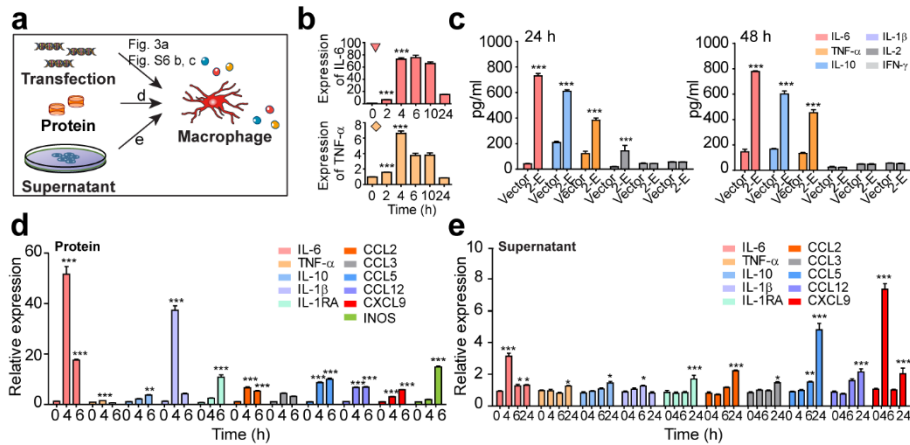

**Supplementary information, Fig. S6: SARS-CoV-2-E provokes robust immune responses in vitro.**

**a** Schematic for detecting the immune response of macrophages. **b-c** Expression of cytokines and chemokines following transfection of 2-E plasmids. **b** Expression levels of IL-6 and TNF- $\alpha$  at indicated time after transfection with 2-E plasmids via qRT-PCR. **c** Cytokine levels after 2-E transfected via ELISA. **d** qRT-PCR analysis of cytokine expression upon treatment with purified 2-E proteins. **e** Incubation with Vero E6 culture supernatant, measuring mRNA expression via qRT-PCR. \* $P < 0.05$ ; \*\* $P < 0.01$ ; \*\*\*  $< 0.001$ ; unpaired Student's t test. All error bars are SEM.
