# Supplementary material
Source: PubMed Central journal article supplement (PMC8324846)
Supplement: 41422_2021_519_MOESM7_ESM.pdf [file 41422_2021_519_MOESM7_ESM.pdf]

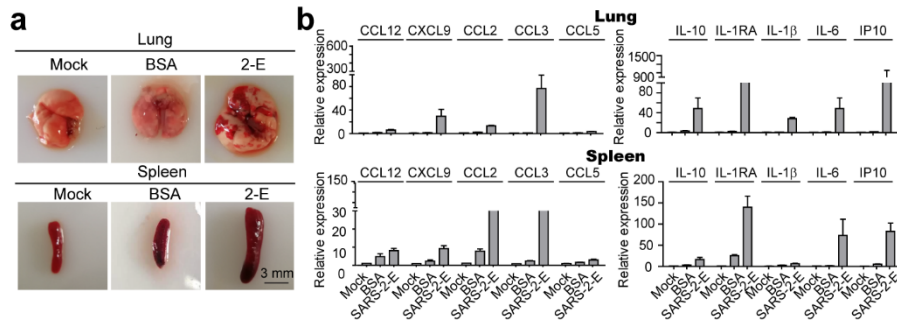

**Supplementary information, Fig. S7: Bovine serum albumin did not cause acute respiratory distress syndrome (ARDS)-like damage in the lung and spleen in mice.**

**a** Gross pathology of lung and spleen from control mice (Mock, Tris-buffered saline (TBS) treated; Bovine serum albumin (BSA) (25 mg/kg body weight)), and model mice (2-E proteins). **b** qRT-PCR analysis of the lung and spleen tissues after injection of TBS, BSA and 2-E proteins.
