# Supplementary material
Source: PubMed Central journal article supplement (PMC8324846)
Supplement: 41422_2021_519_MOESM8_ESM.pdf [file 41422_2021_519_MOESM8_ESM.pdf]

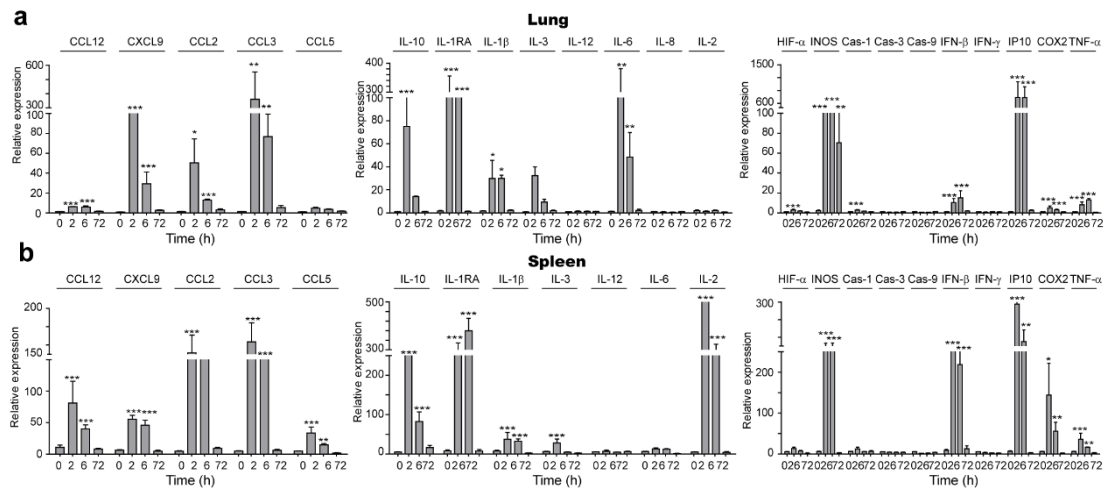

**Supplementary information, Fig. S8: qRT-PCR analysis of lung and spleen tissues**

**after injection of 2-E proteins. \* $P < 0.05$ ; \*\* $P < 0.01$ ; \*\*\* $P < 0.001$ ; unpaired**

**Student's t test. All error bars are SEM.**
