# Supplementary material
Source: PubMed Central journal article supplement (PMC8324846)
Supplement: 41422_2021_519_MOESM9_ESM.pdf [file 41422_2021_519_MOESM9_ESM.pdf]

**a** Images for each mutation with mCherry tag. **b** Expression level of 2-E mutant in Vero E6 cells lines. **c** Expression level for Vero E6 cells after transfecting plasmids as indicated.
