# Supplementary material
Source: PubMed Central journal article supplement (PMC8324846)
Supplement: 41422_2021_519_MOESM10_ESM.pdf [file 41422_2021_519_MOESM10_ESM.pdf]

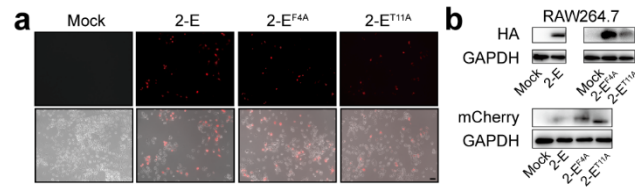

**Supplementary information, Fig. S10: Expression level of 2-E in transfected RAW264.7 cells.**

**a** The fluorescence detection of 2-E-mCherry transfected RAW264.7 cells (bar, 50  $\mu\text{m}$  ).

**b** The expression level of 2-E in 2-E-HA (Up) or 2-E-mCherry (Down) transfected RAW264.7 cells.
