# Supplementary material
Source: PubMed Central journal article supplement (PMC8324846)
Supplement: 41422_2021_519_MOESM11_ESM.pdf [file 41422_2021_519_MOESM11_ESM.pdf]

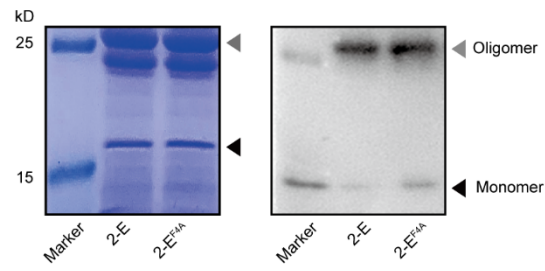

**Supplementary information, Fig. S11: Purification of 2-E and 2-E<sup>F4A</sup> proteins.**

Purification of full-length 2-E and 2-E<sup>F4A</sup> proteins with Ni-NTA affinity chromatography. Left: 15% SDS-PAGE gel with coomassie blue staining; Right: Western blot probed with anti-his antibody.
