# Supplementary material
Source: PubMed Central journal article supplement (PMC8324846)
Supplement: 41422_2021_519_MOESM14_ESM.pdf [file 41422_2021_519_MOESM14_ESM.pdf]

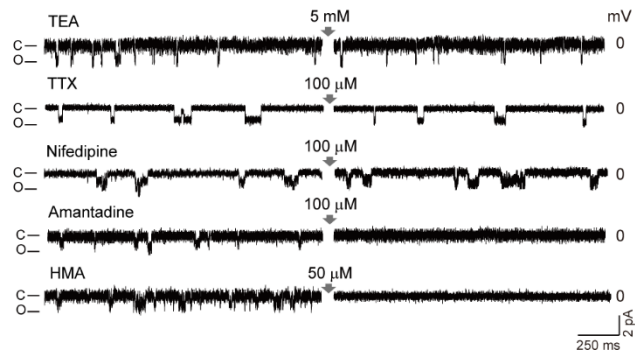

**Supplementary information, Fig. S14: Representative single-channel traces after exposure to the indicated compounds.** Representative single-channel traces after exposure to the indicated compounds at indicated concentrations. Once ion channel conductance was detected, compounds were added to the *trans* chamber while stirring to facilitate binding of the compound to the channel. The gray arrow indicates the application of compounds ( $n \geq 3$ ).
