# Supplementary material
Source: PubMed Central journal article supplement (PMC8324846)
Supplement: 41422_2021_519_MOESM16_ESM.pdf [file 41422_2021_519_MOESM16_ESM.pdf]

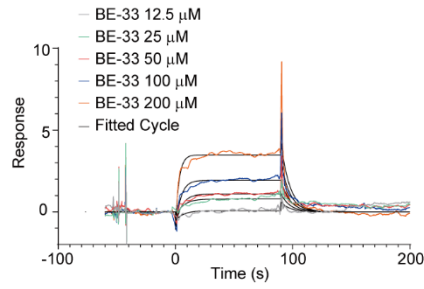

| Ka (1/Ms) | Kd (1/s) | KD(M)    |
|-----------|----------|----------|
| 976.1     | 0.1317   | 1.349E-4 |

**Supplementary information, Fig. S16: Direct binding of BE-33 with 2-E channels.**

SPR analysis of BE-33 binding to 2-E protein. The amount of the ligand bound to 2-E was subsequently detected, and association and dissociation curves were obtained (Up). Dissociation constant (KD) was calculated after fitting these data to fit curves through non-linear regression analysis (Down).
